# Supplementary material
Source: MDPI journal article supplement (https://www.mdpi.com/2075-163X/12/6/756)
Supplement: s1 [file s1]

# Dissolution and Solubility of the Calcite-Otavite Solid Solutions [(Ca<sub>1-x</sub>Cd<sub>x</sub>)CO<sub>3</sub>] at 25°C

Table S1. Speciation reaction in the PHREEQC simulation.

| Speciation reaction                                                                                | log K   |
|----------------------------------------------------------------------------------------------------|---------|
| $\text{Cd}^{2+} + \text{H}_2\text{O} = \text{CdOH}^+ + \text{H}^+$                                 | -10.097 |
| $\text{Cd}^{2+} + \text{CO}_3^{2-} = \text{CdCO}_3^0$                                              | 4.3578  |
| $\text{Cd}^{2+} + 2\text{CO}_3^{2-} = \text{Cd}(\text{CO}_3)_2^{2-}$                               | 7.2278  |
| $\text{Cd}^{2+} + \text{H}^+ + \text{CO}_3^{2-} = \text{CdHCO}_3^+$                                | 10.6863 |
| $\text{Ca}^{2+} + \text{H}_2\text{O} = \text{CaOH}^+ + \text{H}^+$                                 | -12.697 |
| $\text{Ca}^{2+} + \text{H}^+ + \text{CO}_3^{2-} = \text{CaHCO}_3^+$                                | 11.599  |
| $\text{CO}_3^{2-} + \text{Ca}^{2+} = \text{CaCO}_3^0$                                              | 3.2     |
| $\text{H}^+ + \text{CO}_3^{2-} = \text{HCO}_3^-$                                                   | 10.329  |
| $2\text{H}^+ + \text{CO}_3^{2-} = \text{H}_2\text{CO}_3^0$                                         | 16.681  |
| $\text{Cd}(\text{OH})_2 (\text{am}) + 2\text{H}^+ = \text{Cd}^{2+} + 2\text{H}_2\text{O}$          | 13.73   |
| $\text{Cd}(\text{OH})_2 + 2\text{H}^+ = \text{Cd}^{2+} + 2\text{H}_2\text{O}$                      | 13.644  |
| $\text{CdO} (\text{Monteponite}) + 2\text{H}^+ = \text{Cd}^{2+} + \text{H}_2\text{O}$              | 15.1034 |
| $\text{CdCO}_3 (\text{Otavite}) = \text{Cd}^{2+} + \text{CO}_3^{2-}$                               | -12     |
| $\text{CaO} (\text{Lime}) + 2\text{H}^+ = \text{Ca}^{2+} + \text{H}_2\text{O}$                     | 32.6993 |
| $\text{Ca}(\text{OH})_2 (\text{Portlandite}) + 2\text{H}^+ = \text{Ca}^{2+} + 2\text{H}_2\text{O}$ | 22.804  |
| $\text{CaCO}_3 (\text{Calcite}) = \text{Ca}^{2+} + \text{CO}_3^{2-}$                               | -8.48   |
| $\text{CaCO}_3 (\text{Aragonite}) = \text{Ca}^{2+} + \text{CO}_3^{2-}$                             | -8.3    |

Note: Compiled from the minteq.v4.dat database (Parkhurst and Appelo, 2013).

Table S2. Solubility constants (log K) of otavite at standard state [ $\text{CdCO}_{3(\text{s})} = \text{Cd}^{2+} + \text{CO}_3^{2-}$ ].

| log K         | Reference                                                                                                                                                                                                                                                                                                  |
|---------------|------------------------------------------------------------------------------------------------------------------------------------------------------------------------------------------------------------------------------------------------------------------------------------------------------------|
| -13.74        | Smith, R.M.; Martell, A.E. Critical Stability Constants, Volume 4, Inorganic Complexes, Plenum Press: New York United States, 1976; pp. 1–257.                                                                                                                                                             |
| -13.6         | Zhuk, N.P. Thermodynamic constants of sulfates, carbonates, chromates, bromates, iodates, oxalates, and other salts slightly soluble in water. Zhurnal Fizicheskoi Khimii 1954, 28, 1690–1697.                                                                                                             |
| -11.284       | Latimer, W.M. The Oxidation States of the Elements and their Potentials in Aqueous Solutions, 2nd ed.; Prentice Hall: New York, United States, 1952; pp. 1–392.                                                                                                                                            |
| -11.209       | Wagman, D.D.; Evans, W.H.; Parker, V.B.; Schumm, R.H.; Halow, I.; Bailey, S.M.; Churney, K.L.; Nuttall, R.L. The NBS tables of chemical thermodynamic properties: Selected values for inorganic and C1 and C2 organic substances in SI units. J. Phys. Chem. Ref. Data 1982, 11(supp. 2), 1–392.           |
| -11.292       | Egorov, A.M.; Titova, Z.P. Solubility products of salts with polyatomic ions as a function of the temperature. Zhurnal Neorganicheskoi Khimii 1962, 7, 275–278.                                                                                                                                            |
| -12.06        | Krestov, G.A.; Kobenin, V.A.; Sokolov, V.N. Method for calculating the solubility product at 273–373°K. Zhurnal Neorganicheskoi Khimii 1977, 22, 2864–3867.                                                                                                                                                |
| -11.31 ± 0.03 | Davis, J.A.; Fuller, C.C.; Cook, A.S. A model for trace metal sorption processes at the calcite surface: Adsorption of $\text{Cd}^{2+}$ and subsequent solid solution formation. Geochim. Cosmochim. Acta 1987, 51, 1477–1490.                                                                             |
| -12.1 ± 0.1   | Stipp S.L.; Parks G.A.; Nordstrom D.K.; Leckie J.O. Solubility-product constant and thermodynamic properties for synthetic otavite, $\text{CdCO}_{3(\text{s})}$ , and aqueous association constants for the Cd(II)-CO <sub>2</sub> -H <sub>2</sub> O system. Geochim. Cosmochim. Acta 1993, 57, 2699–2713. |

|               |                                                                                                                                                                                                                                                                                                                                                 |
|---------------|-------------------------------------------------------------------------------------------------------------------------------------------------------------------------------------------------------------------------------------------------------------------------------------------------------------------------------------------------|
| -12.03 ± 0.13 | Gamsjäger, H.; Magalhães, M.C.F.; Königsberger, E.; Sawada, K.; Churagulov, B.R.; Schmidt, P. and Zeng, D. IUPAC-NIST Solubility Data Series. 92. Metal Carbonates. Part 1. Solubility and related thermodynamic quantities of cadmium (II) carbonate in aqueous systems. J. Phys. Chem. Ref. Data 2011, 40, 043104.                            |
| -12.0         | (minteq.v4.dat) Allison, J.D.; Brown, D.S.; Novo-Gradac, K.J. MINTEQA2/PRODEFA2, A Geochemical Assessment Model for Environmental Systems: Version 3.0 User's Manual. Environmental Research Laboratory, Office of Research and Development, U.S. Environmental Protection Agency, Athens, Georgia, United States, 1991; pp. 1–106.             |
| -12.1         | (wateq4f.dat) Parkhurst, D.L.; Appelo, C.A.J. Description of Input and Examples for PHREEQC Version 3, A Computer Program for Speciation, Batch-Reaction, One-Dimensional Transport, and Inverse Geochemical Calculations; Techniques and Methods, Book 6, Chap. A43; U.S. Geological Survey: Denver, Colorado, United States, 2013; pp. 1–497. |
| -12.2288      | (llnl.dat) Plummer, L.N.; Busenberg, E. The solubilities of calcite, aragonite and vaterite in CO <sub>2</sub> -H <sub>2</sub> O solutions between 0 and 90°C, and an evaluation of the aqueous model for the system CaCO <sub>3</sub> -CO <sub>2</sub> -H <sub>2</sub> O. Geochim. Cosmochim. Acta 1982, 46, 1011–1040.                        |

**Table S3.** Gibbs free energies of formation ( $\Delta G_f^\circ$ ) of otavite at standard state.

| $\Delta G_f^\circ$ (kJ/mol) | Reference                                                                                                                                                                                                                                                                                           |
|-----------------------------|-----------------------------------------------------------------------------------------------------------------------------------------------------------------------------------------------------------------------------------------------------------------------------------------------------|
| -683.46                     | Zhuk, N.P. Thermodynamic constants of sulfates, carbonates, chromates, bromates, iodates, oxalates, and other salts slightly soluble in water. Zhurnal Fizicheskoi Khimii 1954, 28, 1690–1697.                                                                                                      |
| -595.07 ± 4.18              | Robie, R.A. Thermodynamic properties of minerals; Open File Report TEI-816; U.S. Geological Survey: Denver, Colorado, United States, 1962; pp. 1–31.                                                                                                                                                |
| -669.44 ± 2.64              | Robie, R.A.; Hemingway, B.S.; Fisher, J.R. Thermodynamic properties of minerals and related substances at 298.15 K and 1 bar (105 Pa) pressure and at higher temperatures; U.S. Geological Survey Bulletin 1452; U.S. Government Printing Office: Washington D.C., United States, 1978; pp. 1–456.  |
| -779.43                     | Barin, I.; Knacke, O. and Kubaschewski, O. Thermodynamic properties of inorganic substances, Supplement; Springer Verlag: Berlin, Germany, 1977; pp. 1–861.                                                                                                                                         |
| -662.7                      | Sverjensky, D.A. Prediction of Gibbs free energies of calcite type carbonates and the equilibrium distribution of trace elements between carbonates and aqueous solutions. Geochim. Cosmochim. Acta 1984, 48, 1127–1134.                                                                            |
| -670.3 ± 2.1                | La Iglesia, A.; Félix, J.F. Estimation of thermodynamic properties of mineral carbonates at high and low temperatures from the sum of polyhedral contributions. Geochim. Cosmochim. Acta 1994, 58, 3983–3991.                                                                                       |
| -674.3 ± 0.6                | Gamsjäger, H.; Preis, W.; Königsberger, E.; Magalhaes, M.C.; Brandao, P. Solid-solute phase equilibria in aqueous solution. XI. Aqueous solubility and standard Gibbs energy of cadmium carbonate. J. Solution Chem. 1999, 28, 711–720.                                                             |
| -671.1 ± 1.1                | Rock, P.A.; Casey W.H.; McBeath M.K.; Walling E.M. A new method for determining Gibbs energies of formation of metal-carbonate solid solutions: 1. The Ca <sub>x</sub> Cd <sub>1-x</sub> CO <sub>3(s)</sub> system at 298 K and 1 bar. Geochim. Cosmochim. Acta 1994, 58, 4281–4291.                |
| -674.7±0.6                  | Stipp S.L.; Parks G.A.; Nordstrom D.K.; Leckie J.O. Solubility-product constant and thermodynamic properties for synthetic otavite, CdCO <sub>3(s)</sub> , and aqueous association constants for the Cd(II)-CO <sub>2</sub> -H <sub>2</sub> O system. Geochim. Cosmochim. Acta 1993, 57, 2699–2713. |

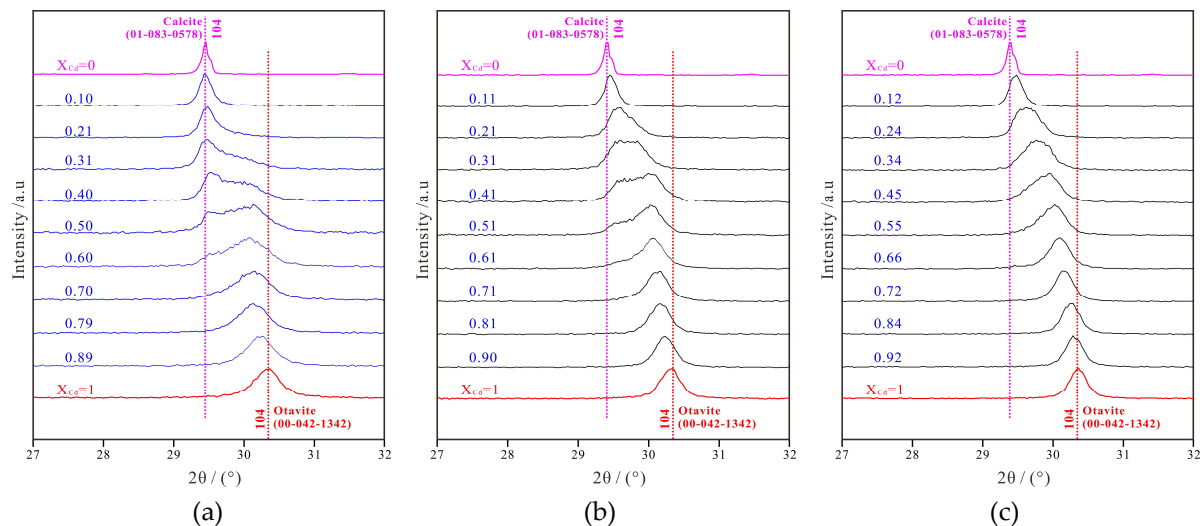

**Figure S1.** Position variation of the strongest peak (104) with the solid composition  $X_{Cd}$ : (a) before dissolution, and (b) after dissolution in the  $N_2$ -degassed water for 270d and (c) after dissolution in the  $CO_2$ -saturated water for 270d.

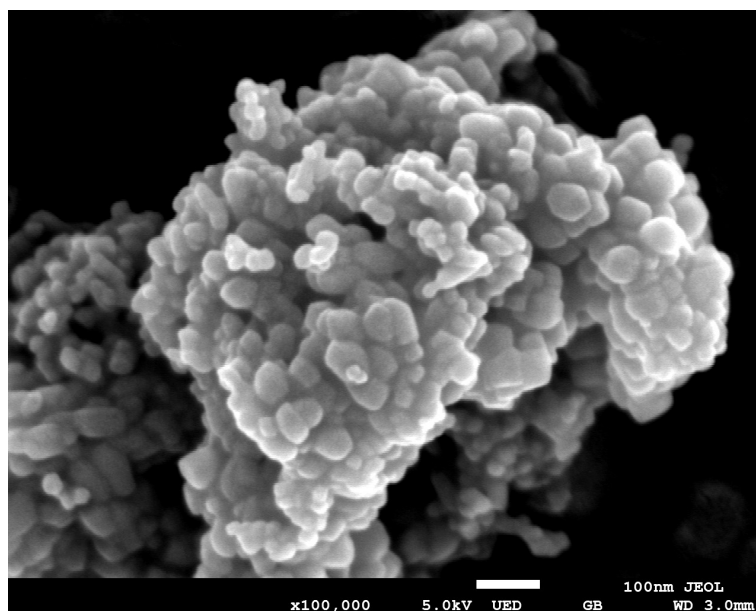

(a) Cal-Ot-07  $[(Ca_{0.30}Cd_{0.70})CO_3]$

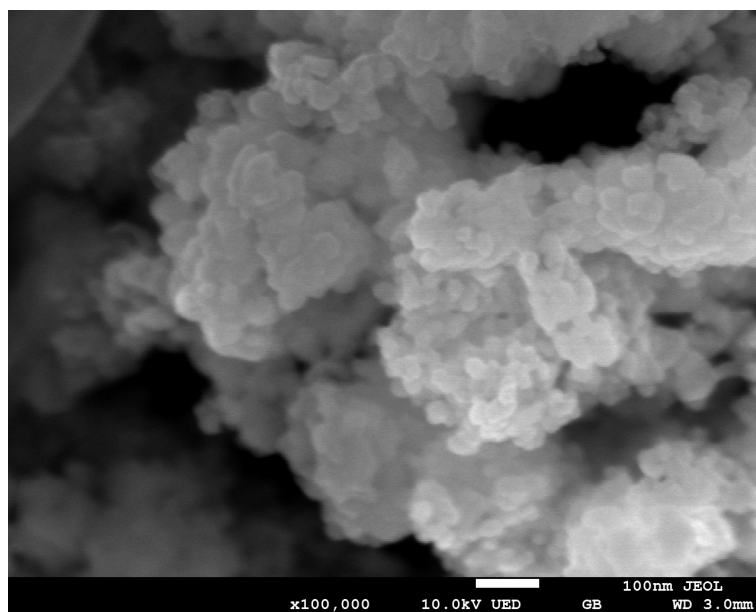

(b) Cal-Ot-10 [(Ca<sub>0.00</sub>Cd<sub>1.00</sub>)CO<sub>3</sub>]

**Figure S2.** SEM image of the (Ca<sub>1-x</sub>Cd<sub>x</sub>)CO<sub>3</sub> solid solutions before dissolution.

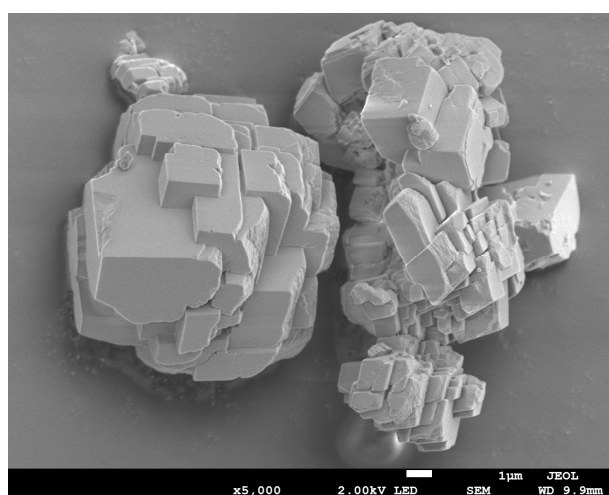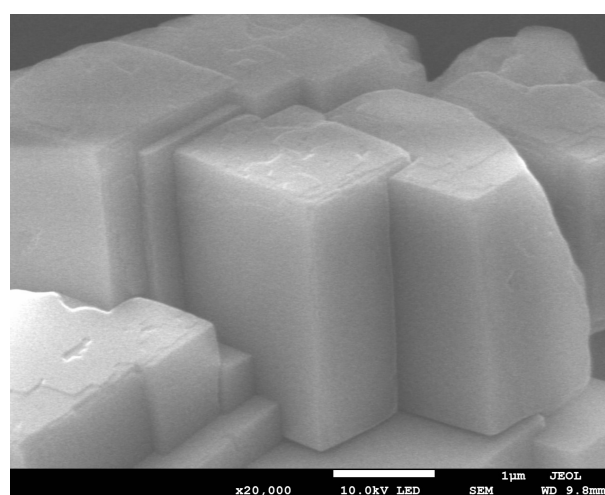

(a) in the N<sub>2</sub>-degassed water

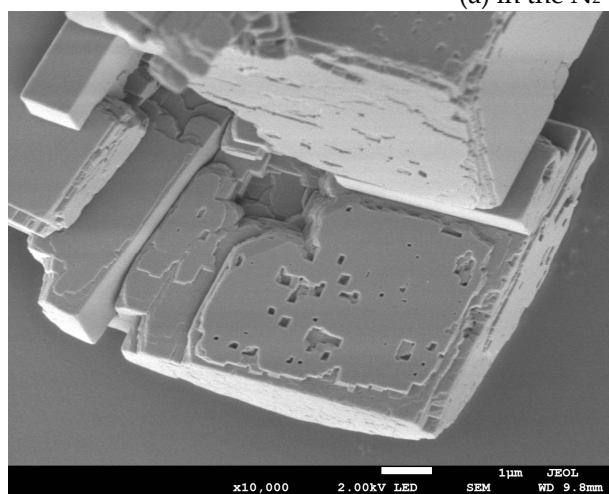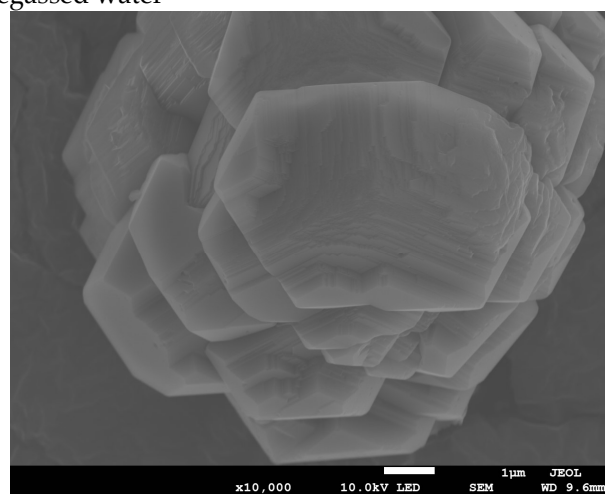

(b) in the CO<sub>2</sub>-saturated water

**Figure S3.** SEM image of calcite (Cal-Ot-00) after dissolution for 270d.

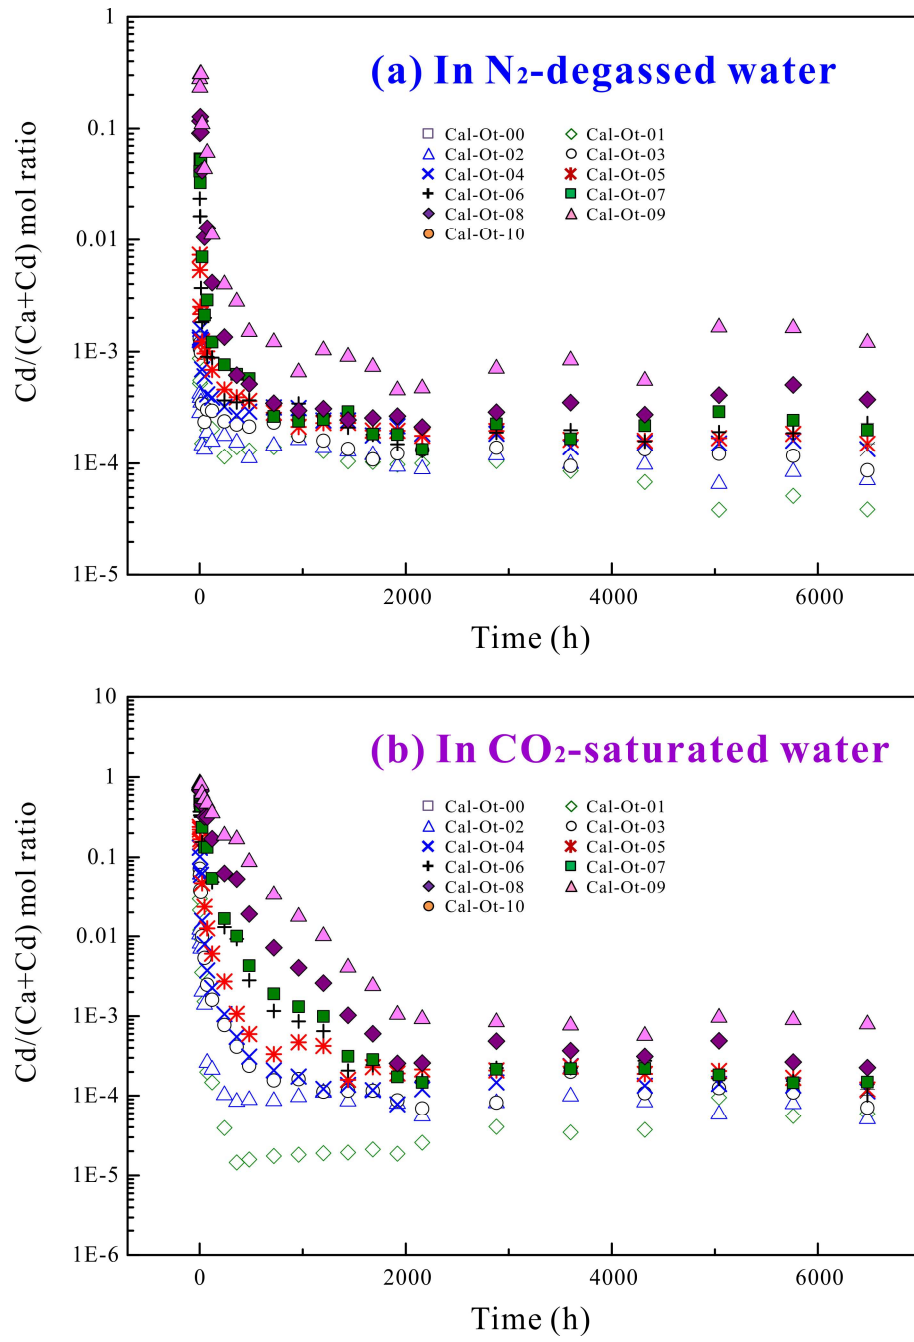

**Figure S4.** Change of the  $Cd/(Ca+Cd)$  mole ratios of the aqueous phases during the dissolution of the  $(Ca_{1-x}Cd_x)CO_3$  solid solution.

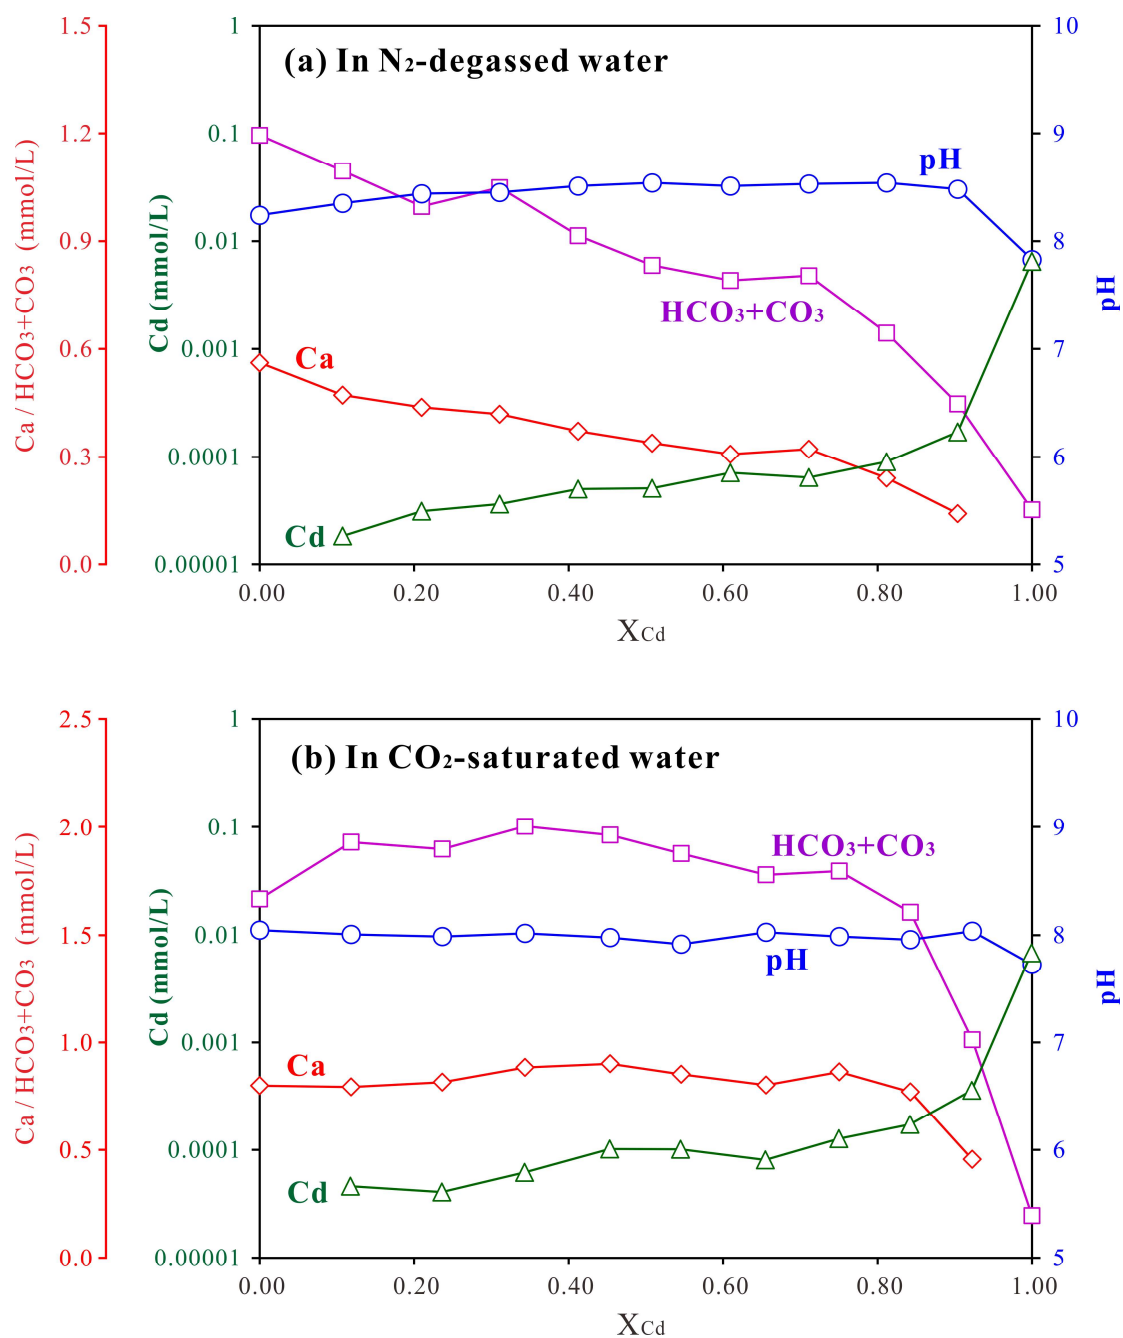

**Figure S5.** Variation of the final aqueous phases with the solid  $X_{Cd}$  mol ratios during the 270d dissolution of the  $(Ca_{1-x}Cd_x)CO_3$  solid solutions in water.

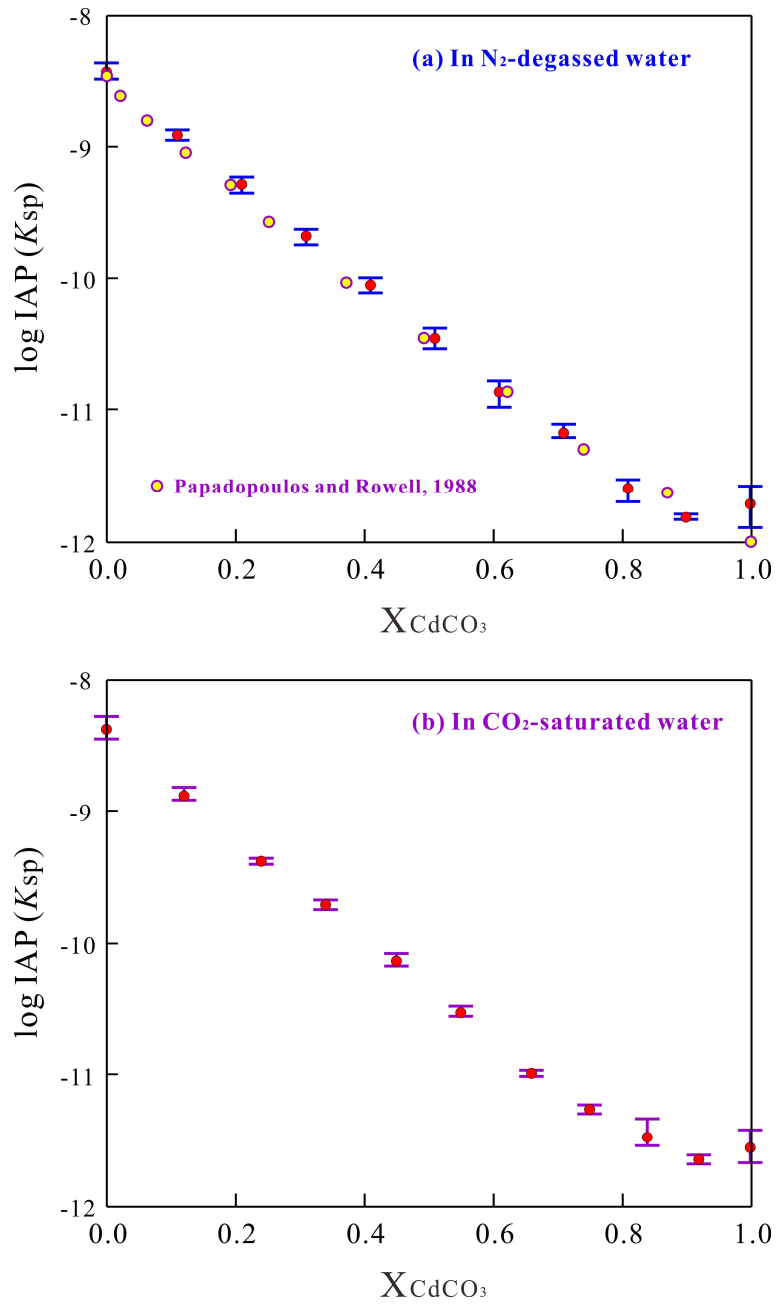

**Figure S6.** Change of log IAP ( $\approx \log K_{sp}$ ) for the  $(Ca_{1-x}Cd_x)CO_3$  solid solution with the  $CdCO_3$  mole fraction ( $X_{CdCO_3}$ ).

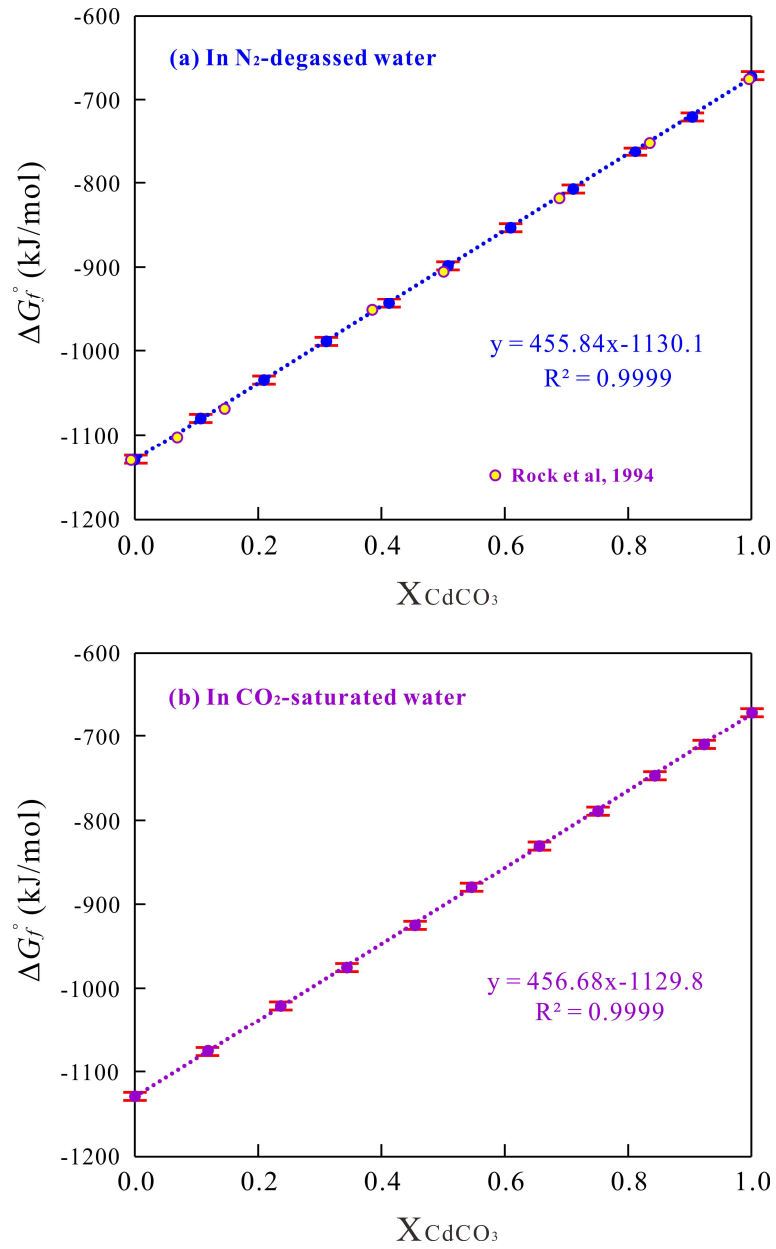

**Figure S7.** Change of the Gibbs free energy of formation ( $\Delta G_f^\circ$ ) for the  $(\text{Ca}_{1-x}\text{Cd}_x)\text{CO}_3$  solid solution with the  $\text{CdCO}_3$  mole fraction ( $X_{\text{CdCO}_3}$ ).



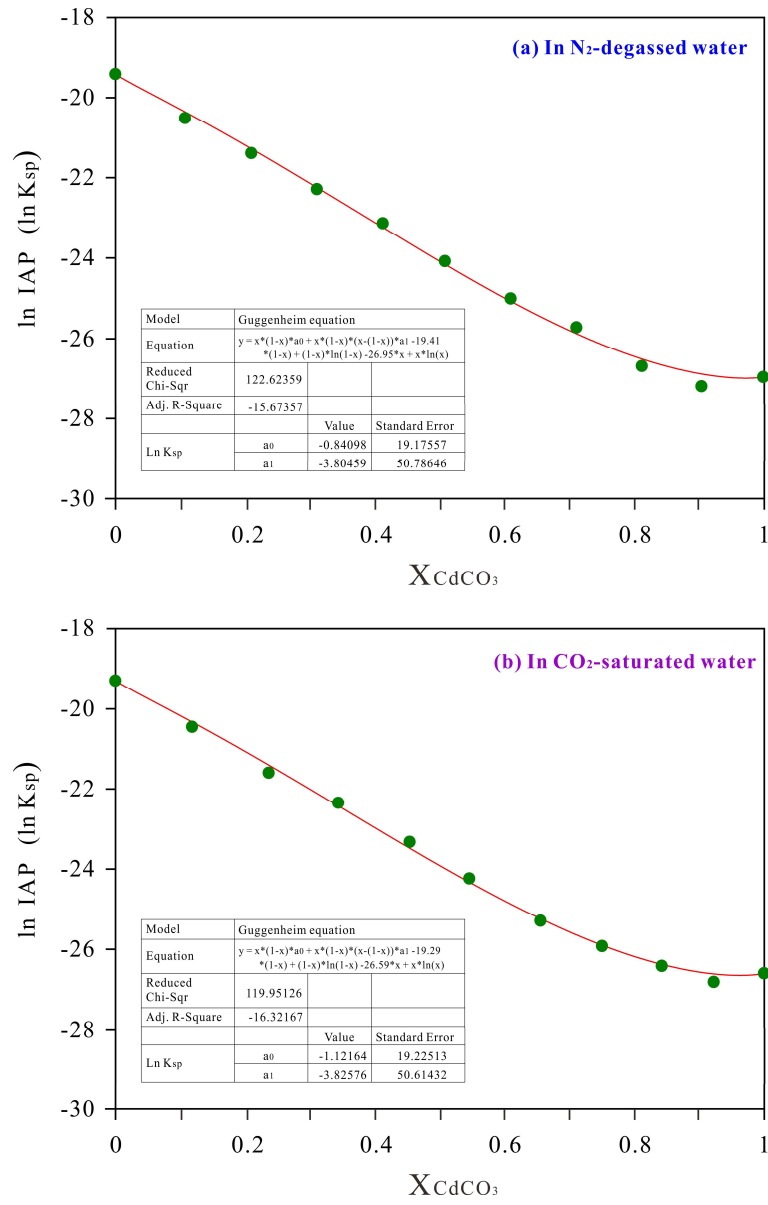

**Figure S8.** Estimation of the Guggenheim coefficients ( $a_0$  and  $a_1$ ) for the non-ideal (Ca<sub>1-x</sub>Cd<sub>x</sub>)CO<sub>3</sub> solid solution.

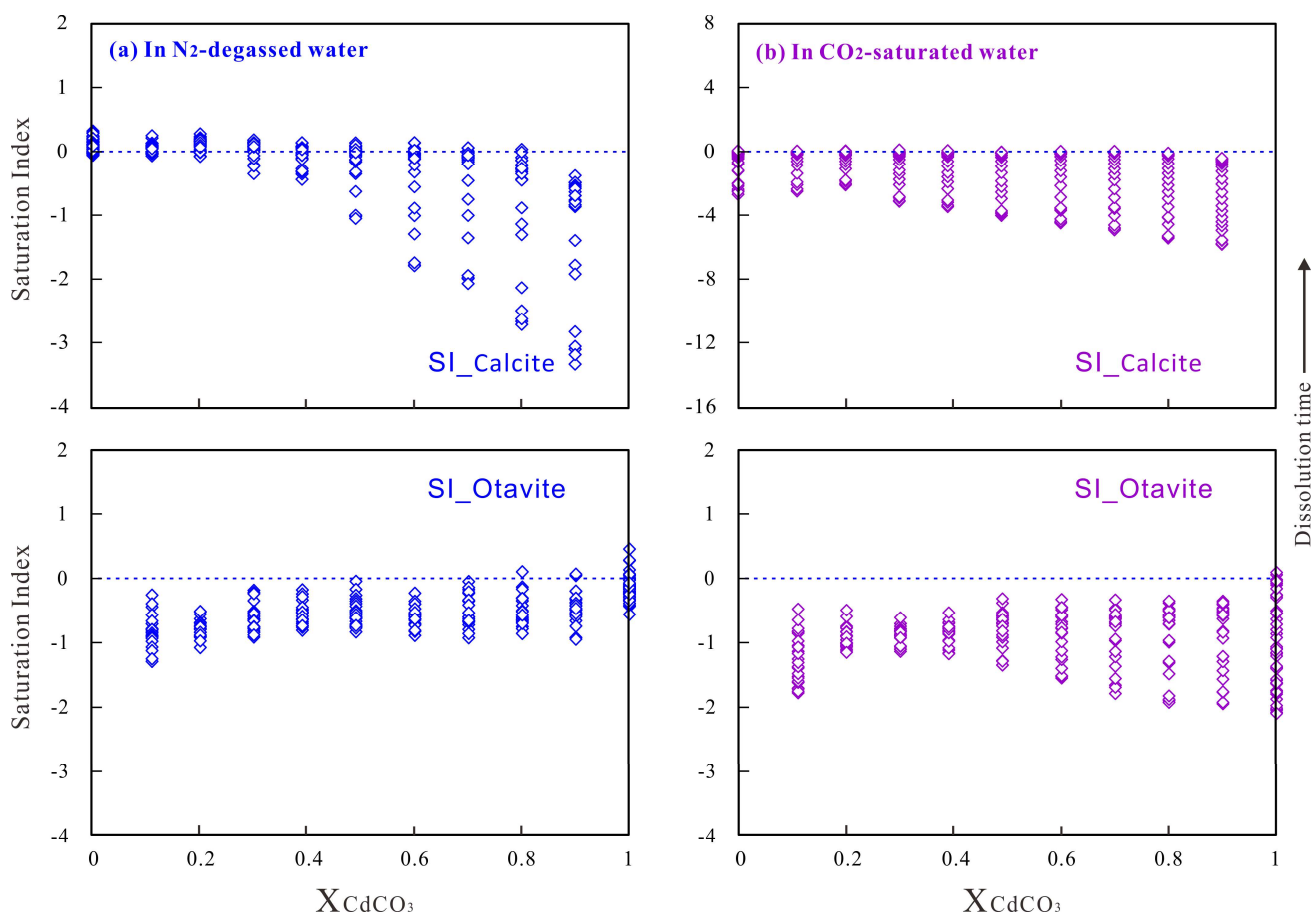

**Figure S9.** Saturation Index (SI) of the aqueous solution with respect to calcite and otavite during the dissolution of the  $(\text{Ca}_{1-x}\text{Cd}_x)\text{CO}_3$  solid solution for 1, 3, 6, 12, 24, 48, 72, 120, 240, 360, 480, 720, 960, 1200, 1440, 1680, 1920, 2160, 2880, 3600, 4320, 5040, 5760 and 6480 h.
